# Supplementary material
Source: Springer Nature journal article supplement (https://www.springermedizin.de/resource/supplementary/13014_2012_664_MOESM1_ESM.pdf/9633862)

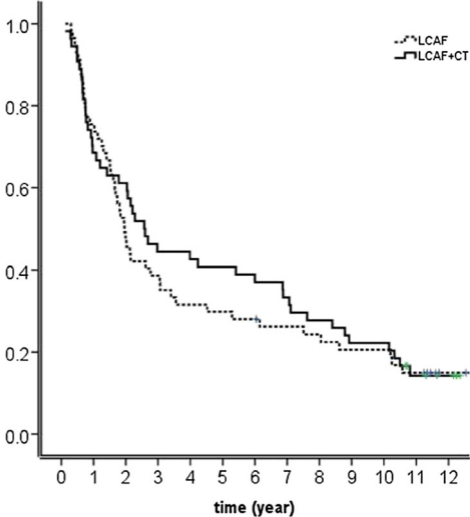

No. at risk

|         |    |    |    |    |    |    |   |
|---------|----|----|----|----|----|----|---|
| LCAF    | 57 | 28 | 17 | 15 | 12 | 10 | 2 |
| LCAF+CT | 54 | 32 | 19 | 18 | 14 | 11 | 3 |

Supplement: MOESM1 [file 9633862]
